# Supplementary material for: d(TGnT) DNA sequences do not necessarily form tetramolecular G-quadruplexes
Source: Royal Society of Chemistry journal article supplement (doi:10.1039/c2cc33316c), 2012-01-01
Supplement: c2cc33316c.pdf [file c2cc33316c.pdf]

# d(TG<sub>n</sub>T) DNA sequences do not necessarily form tetramolecular G-quadruplexes

Laure Joly,<sup>a</sup> Frédéric Rosu<sup>a</sup> and Valérie Gabelica<sup>\*a</sup>

<sup>a</sup> Physical Chemistry and Mass Spectrometry Laboratory, Department of Chemistry, University of Liège, B-4000 Liège, Belgium. Fax: +32 4 3663413; Tel: +32 4 3663432; E-mail: v.gabelica@ulg.ac.be

Electronic Supporting Information.

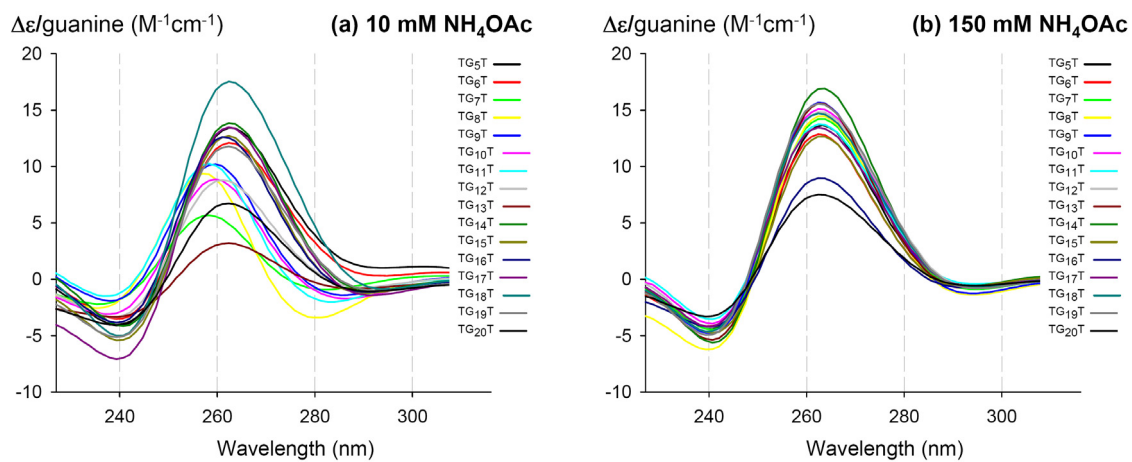

Figure S1: Complete set of CD spectra.

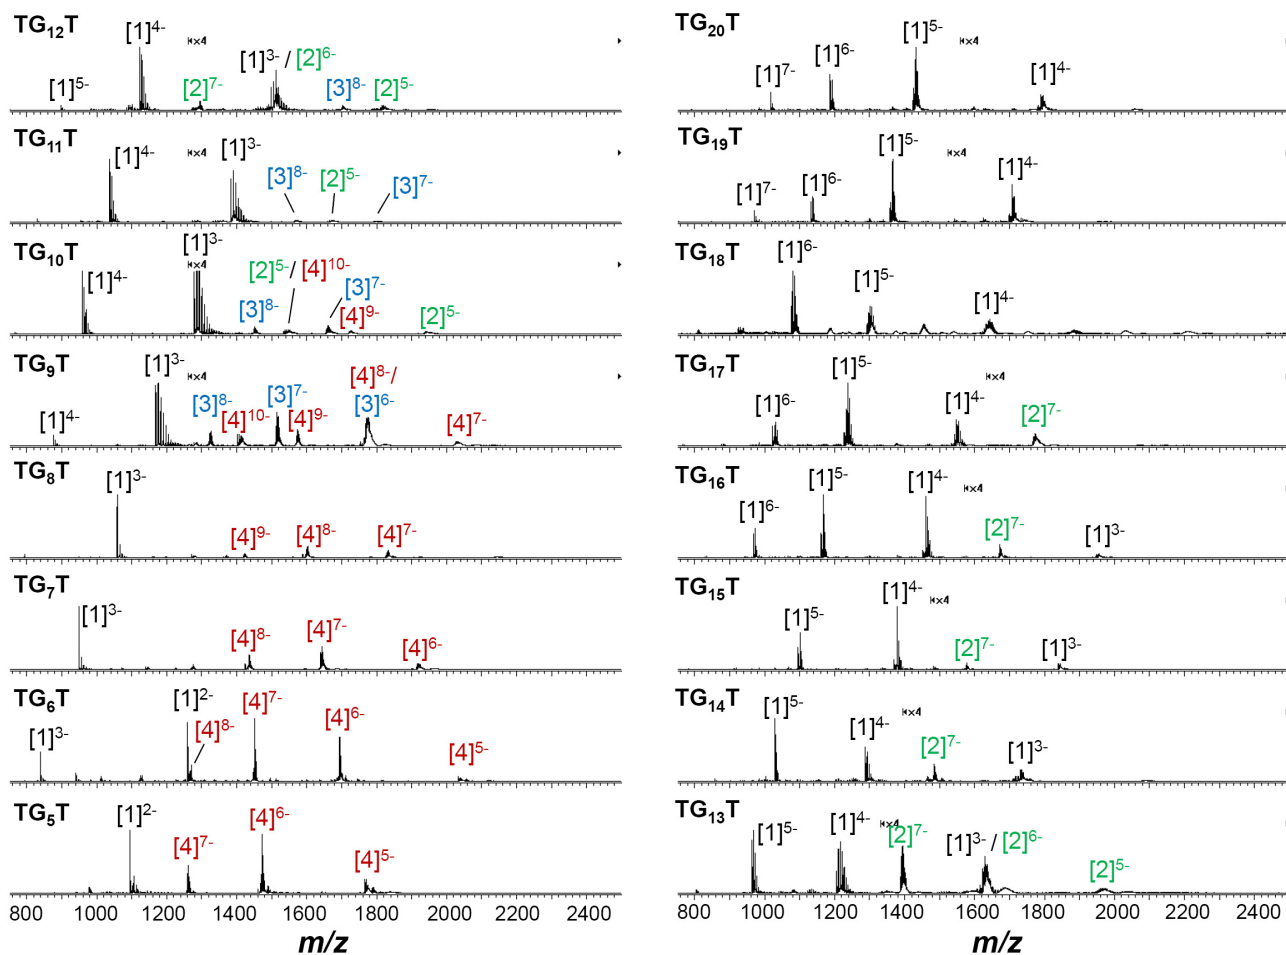

**Figure S2:** Complete set of ESI-MS spectra in 10 mM NH<sub>4</sub>OAc. Note that spectra from n=9 to n=20 contain zooms (signal magnified 4 times) in the multimer region. The monomeric species is the most abundant. The spectra were smoothed (mean function, 2\*20 channels) and background-subtracted for clarity.

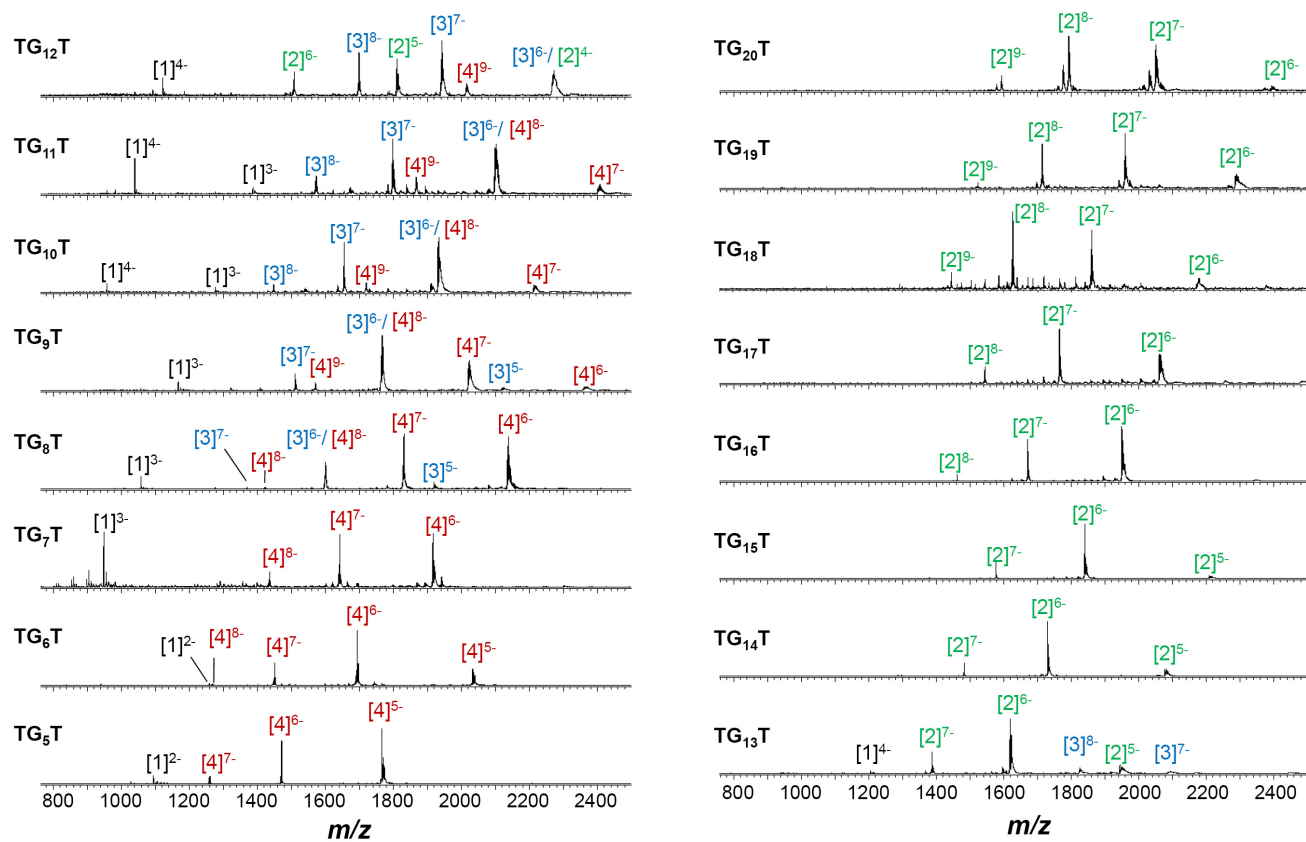

**Figure S3:** Complete set of ESI-MS spectra in 150 mM NH<sub>4</sub>OAc. The spectra were smoothed (mean function, 2\*20 channels) and background-subtracted for clarity.

**Table S1:** For sequences of different G-tract length ( $n$ ), summary of the number of strands ( $s$ ) detected in the assemblies, number of ammonium ions ( $x$ ) retained in each species observed by ESI-MS, deduction of the number of G-quartets ( $x+1$ ), the number of guanines involved in G-quartets ( $4*(x+1)$ ), and the number of guanines not participating to G-quartets ( $s*n - 4*(x+1)$ ). The number of strands of the species with the largest mass spectral peak areas is underlined.

| $n$ | 150 mM NH <sub>4</sub> OAc |      |                    |                         |                                 | 10 mM NH <sub>4</sub> OAc |                  |                    |                         |                                 |
|-----|----------------------------|------|--------------------|-------------------------|---------------------------------|---------------------------|------------------|--------------------|-------------------------|---------------------------------|
|     | $s$                        | $x$  | Quartets ( $x+1$ ) | G in quartet: $4*(x+1)$ | G out of quartet: $s*n-4*(x+1)$ | $s$                       | $x$              | Quartets ( $x+1$ ) | G in quartet: $4*(x+1)$ | G out of quartet: $s*n-4*(x+1)$ |
| 5   | <u>4</u>                   | 4    | 5                  | 20                      | 0                               | <u>4</u>                  | 4                | 5                  | 20                      | 0                               |
| 6   | <u>4</u>                   | 5    | 6                  | 24                      | 0                               | <u>4</u>                  | 5                | 6                  | 24                      | 0                               |
| 7   | <u>4</u>                   | 6    | 7                  | 28                      | 0                               | <u>4</u>                  | 5-6              | 6-7                | 24-28                   | 4-0                             |
| 8   | <u>4</u>                   | 5-6  | 6-7                | 24-28                   | 8-4                             | <u>4</u>                  | 6-7              | 7-8                | 28-32                   | 4-0                             |
|     | <u>3</u>                   | 4    | 5                  | 20                      | 4                               | <u>1</u>                  | 0 <sup>(a)</sup> | --                 | --                      | --                              |
| 9   | <u>4</u>                   | 7-8  | 8-9                | 32-36                   | 4-0                             | <u>1</u>                  | 0 <sup>(a)</sup> | --                 | --                      | --                              |
|     | <u>3</u>                   | 4    | 5                  | 20                      | 7                               | <u>3</u>                  | 0 <sup>(a)</sup> | --                 | --                      | --                              |
|     |                            |      |                    |                         |                                 | <u>4</u>                  | 7-8              | 8-9                | 32-36                   | 4-0                             |
| 10  | <u>4</u>                   | 8    | 9                  | 36                      | 4                               | <u>1</u>                  | 0 <sup>(a)</sup> | --                 | --                      | --                              |
|     | <u>3</u>                   | 5    | 6                  | 24                      | 6                               | <u>2</u>                  | 0 <sup>(a)</sup> | --                 | --                      | --                              |
|     |                            |      |                    |                         |                                 | <u>3</u>                  | 0 <sup>(a)</sup> | --                 | --                      | --                              |
|     |                            |      |                    |                         |                                 | <u>4</u>                  | 0 <sup>(a)</sup> | --                 | --                      | --                              |
| 11  | <u>4</u>                   | 9-10 | 10-11              | 40-44                   | 4-0                             | <u>1</u>                  | 0 <sup>(a)</sup> | --                 | --                      | --                              |
|     | <u>3</u>                   | 6    | 7                  | 28                      | 13                              | <u>2</u>                  | 0 <sup>(a)</sup> | --                 | --                      | --                              |
|     |                            |      |                    |                         |                                 | <u>3</u>                  | 0 <sup>(a)</sup> | --                 | --                      | --                              |
| 12  | <u>3</u>                   | 7    | 8                  | 32                      | 4                               | <u>1</u>                  | 0 <sup>(a)</sup> | --                 | --                      | --                              |
|     | <u>2</u>                   | 4    | 5                  | 20                      | 4                               | <u>2</u>                  | 0 <sup>(a)</sup> | --                 | --                      | --                              |
|     |                            |      |                    |                         |                                 | <u>3</u>                  | 0 <sup>(a)</sup> | --                 | --                      | --                              |
| 13  | <u>3</u>                   | 8    | 9                  | 36                      | 3                               | <u>1</u>                  | 0 <sup>(a)</sup> | --                 | --                      | --                              |
|     | <u>2</u>                   | 4    | 5                  | 20                      | 6                               | <u>2</u>                  | 0 <sup>(a)</sup> | --                 | --                      | --                              |
| 14  | <u>2</u>                   | 5    | 6                  | 24                      | 4                               | <u>1</u>                  | 0 <sup>(a)</sup> | --                 | --                      | --                              |
| 15  | <u>2</u>                   | 5    | 6                  | 24                      | 6                               | <u>1</u>                  | 2                | 3                  | 12                      | 3                               |
| 16  | <u>2</u>                   | 5    | 6                  | 24                      | 8                               | <u>1</u>                  | 2                | 3                  | 12                      | 4                               |
| 17  | <u>2</u>                   | 5    | 6                  | 24                      | 12                              | <u>1</u>                  | 2                | 3                  | 12                      | 5                               |
| 18  | <u>2</u>                   | 6    | 7                  | 28                      | 8                               | <u>1</u>                  | 2                | 3                  | 12                      | 6                               |
| 19  | <u>2</u>                   | 7    | 8                  | 32                      | 6                               | <u>1</u>                  | 2                | 3                  | 12                      | 7                               |
| 20  | <u>2</u>                   | 7    | 8                  | 32                      | 8                               | <u>1</u>                  | 2                | 3                  | 12                      | 8                               |

<sup>(a)</sup> Only a broad distribution of sodium adducts was detected (for a typical spectrum, see inset of Figure 2,  $n=14$ , in the main text). As this distribution is statistical and starts with zero adducts, we estimate that there is not a specific number of G-quartets formed in these structures.
